# Supplementary material for: Polycationic silk fibroin chelating nano-hydroxyapatite promotes angiogenesis for burn wound healing
Source: Royal Society of Chemistry journal article supplement (doi:10.1039/d5tb02386f), 2026-01-01
Supplement: d5tb02386f1.pdf [file d5tb02386f1.pdf]

## Supporting Information

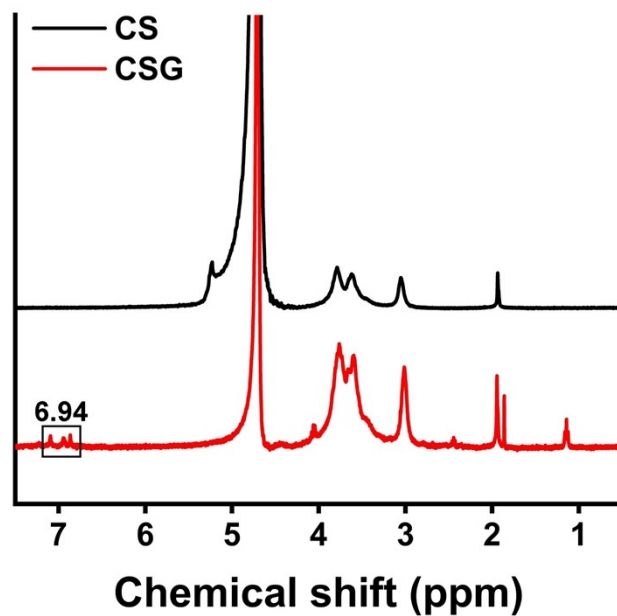

Figure S1.  $^1\text{H}$ -NMR ( $\text{D}_2\text{O}$ ) spectra of CS and CSG.

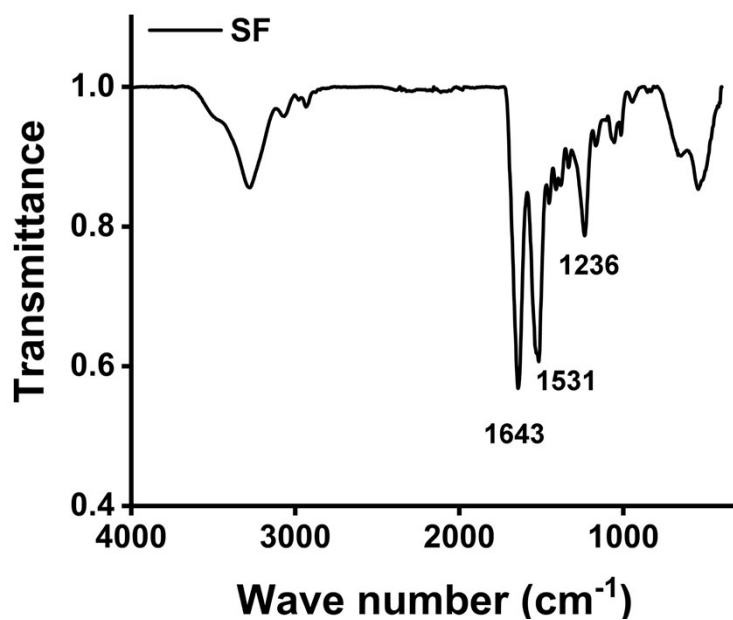

Figure S2. FTIR spectra of SF.

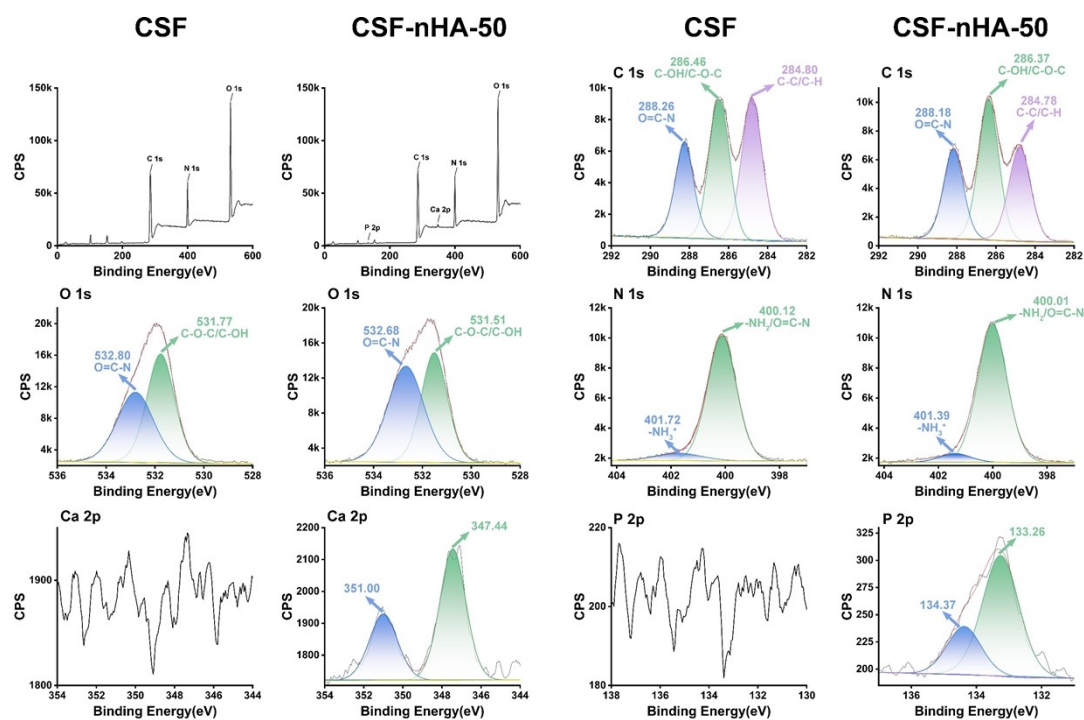

**Figure S3.** XPS analysis of CSF and CSF-nHA-50. Survey scans and high-resolution spectra of C 1s, O 1s, N 1s, Ca 2p, and P 2p.

**Table S1.** EDS elemental analysis of nHA.

| Element | Atomic<br>Concentration (%) | Weight<br>Concentration (%) |
|---------|-----------------------------|-----------------------------|
| O       | 73.11                       | 54.08                       |
| Ca      | 17.59                       | 32.59                       |
| P       | 9.30                        | 13.32                       |

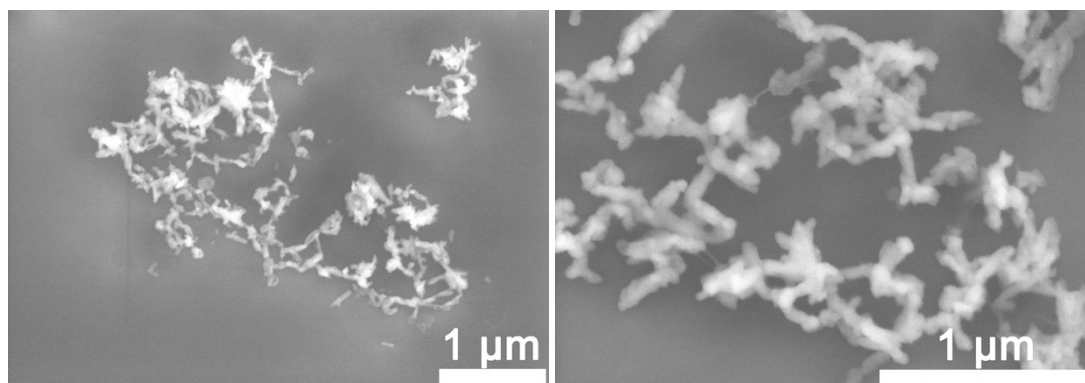

**Figure S4.** Microscopic morphology of nHA observed by SEM.

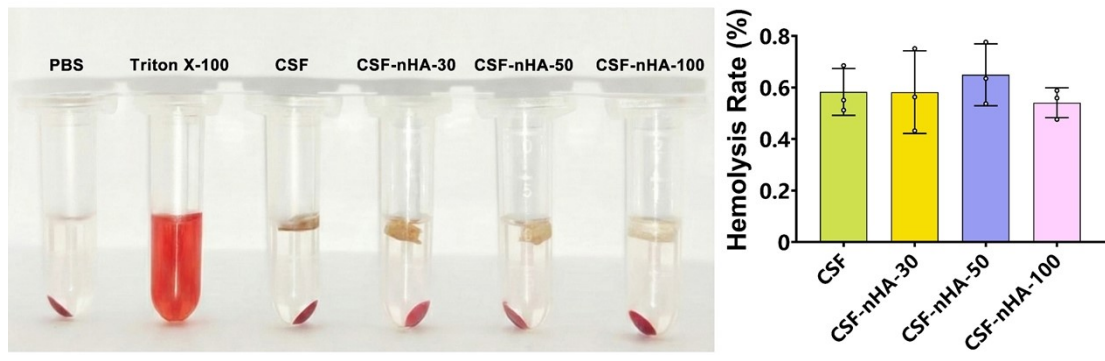

**Fig. S5.** Hemolysis assay and hemolysis ratios of the sponges.
